# Supplementary material for: Cation assisted complexation of octacarbazolylphenyl substituted Zn(ii)-tetraphenylporphyrin with [2,2,2]cryptand
Source: Royal Society of Chemistry journal article supplement (doi:10.1039/c5ra05687j), 2015-01-01
Supplement: c5ra05687j1.pdf [file c5ra05687j1.pdf]

## SUPPORTING INFORMATION

### **Cation assisted complexation of octacarbazolyphenyl substituted Zn(II)-tetraphenylporphyrin with [2,2,2]cryptand**

Galina M. Mamardashvili<sup>a</sup>, Olga V. Maltseva<sup>a</sup>, Nugzar Zh. Mamardashvili<sup>\*, a</sup>, Nguyen Tran  
Nguyen<sup>b</sup>, Wim Dehaen<sup>\*, b</sup>

<sup>a</sup> *Coordination Chemistry of Macrocyclic Compounds, G.A. Krestov Institute of Solution Chemistry of Russian Academy of Sciences, Akademicheskaya St.1, 153045 Ivanovo, Russia*

<sup>b</sup> *Molecular Design and Synthesis, Department of Chemistry, KU Leuven, Celestijnenlaan 200F, B-3001 Leuven, Belgium. Fax: (+32) 16 327990; Tel: +32 16 3 27439; E-mail: wim.dehaen@chem.kuleuven.be*

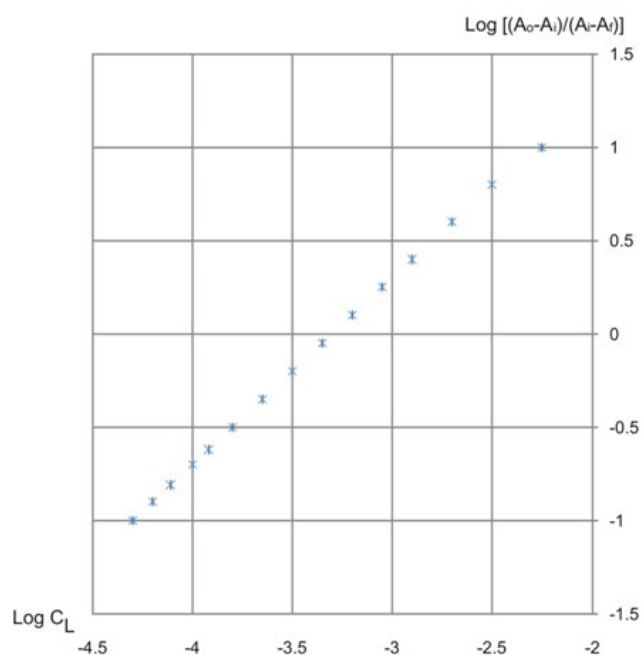

$C_L$  is the ligand concentration,  $A_0$  is the initial optical density at the wavelength  $\lambda$ ,  $A_f$  is the final optical density at the wavelength  $\lambda$ , and  $A_i$  is the current optical density at the wavelength  $\lambda$  at the given concentration.

**Figure 1.SI.** The logarithmic dependence of the optical density of the reaction system **ZnTPP-L** ( $\log[(A_0-A_i)/(A_i-A_f)]$ ) in function of the ligand concentration ( $\log C_{\text{ligand}}$ ).

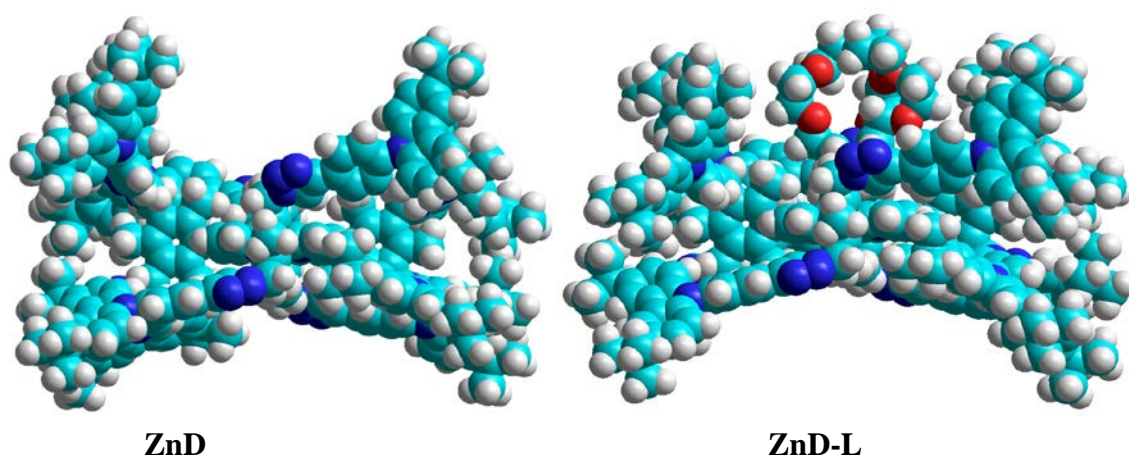

**Figure 2.\_SI.** The structure of **ZnD** and its complex with **L** obtained by computer simulation.

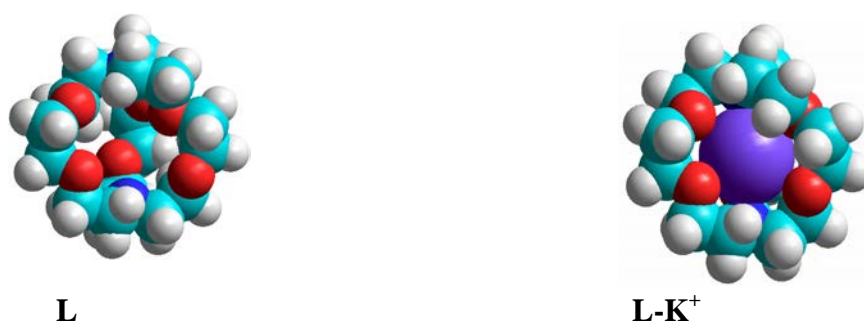

**Figure 3.\_SI.** The structure of **L** and its complex with potassium **L-K<sup>+</sup>** obtained by computer simulation.

**Table\_SI.** Geometric parameters of the [2,2,2]cryptand and its complex with potassium obtained by computer simulation, DFT/B3LYP/6-31G\*\*.

|                                                                    | [2,2,2]cryptand | K <sup>+</sup> [2,2,2]cryptat |
|--------------------------------------------------------------------|-----------------|-------------------------------|
| N <sub>1</sub> -N <sub>10</sub>                                    | 5.995           | 6.466                         |
| O <sub>4</sub> -O <sub>13</sub>                                    | 4.789           | 3.853                         |
| O <sub>4</sub> -O <sub>21</sub>                                    | 4.633           | 4.309                         |
| O <sub>21</sub> -O <sub>13</sub>                                   | 5.373           | 4.231                         |
| O <sub>7</sub> -O <sub>16</sub>                                    | 5.096           | 4.220                         |
| O <sub>7</sub> -O <sub>24</sub>                                    | 3.780           | 4.456                         |
| O <sub>16</sub> -O <sub>24</sub>                                   | 4.523           | 3.863                         |
| C <sub>11</sub> -N <sub>1</sub> -C <sub>19</sub>                   | 118.168         | 113.522                       |
| C <sub>19</sub> -N <sub>1</sub> -C <sub>2</sub>                    | 117.308         | 114.418                       |
| C <sub>2</sub> -N <sub>1</sub> -C <sub>11</sub>                    | 114.355         | 112.800                       |
| C <sub>9</sub> -N <sub>10</sub> -C <sub>18</sub>                   | 117.337         | 114.026                       |
| C <sub>9</sub> -N <sub>10</sub> -C <sub>26</sub>                   | 118.774         | 112.731                       |
| C <sub>18</sub> -N <sub>10</sub> -C <sub>26</sub>                  | 112.450         | 113.101                       |
| O <sub>13</sub> -C <sub>14</sub> -C <sub>15</sub> -O <sub>16</sub> | 64.849          | 63.103                        |
| O <sub>4</sub> -C <sub>5</sub> -C <sub>6</sub> -O <sub>7</sub>     | 76.678          | 67.065                        |
| O <sub>21</sub> -C <sub>22</sub> -C <sub>23</sub> -O <sub>24</sub> | -69.011         | -67.402                       |

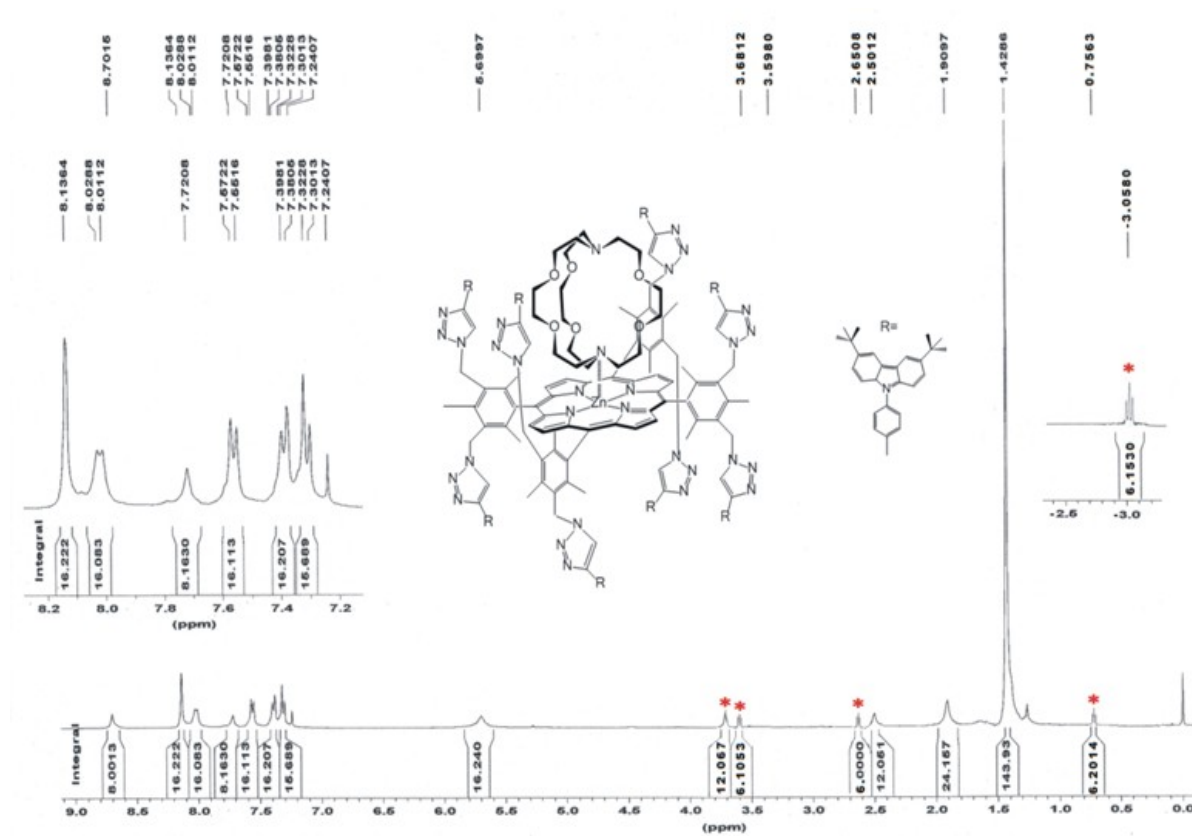

**Figure 4. SI.**  $^1\text{H}$  NMR spectrum of the complex **ZnD-L** in  $\text{CDCl}_3$  at  $25^\circ\text{C}$ ;  $C_{\text{ZnD-L}} = 6.0 \times 10^{-6}$  M. (Red signs in the  $^1\text{H}$  NMR spectrum of the complex label the protons of the ligand).
